# Supplementary material for: Comparative Analysis of Conformational Dynamics and Systematic Characterization of Cryptic Pockets in the SARS-CoV-2 Omicron BA.2, BA.2.75 and XBB.1 Spike Complexes with the ACE2 Host Receptor: Confluence of Binding and Structural Plasticity in Mediating Networks of Conserved Allosteric Sites
Source: MDPI journal article supplement (doi:10.3390/v15102073), 2023-10-10
Supplement: s1 [file s1]

# Supplementary Materials

## Comparative Analysis of Conformational Dynamics and Systematic Characterization of Cryptic Pockets in the SARS-CoV-2 Omicron BA.2, BA.2.75 and XBB.1 Spike Complexes with the ACE2 Host Receptor: Confluence of Binding and Structural Plasticity in Mediating Networks of Conserved Allosteric Sites

Mohammed Alshahrani,<sup>1</sup> Grace Gupta,<sup>1</sup> Sian Xiao<sup>2</sup>, Peng Tao<sup>2</sup>, Gennady Verkhivker,<sup>1,3\*</sup>

<sup>1</sup> Keck Center for Science and Engineering, Graduate Program in Computational and Data Sciences, Schmid College of Science and Technology, Chapman University, Orange, CA 92866, USA;  
alshahrani@chapman.edu (M.A.); grgupta@chapman.edu (G.G.)

<sup>2</sup> Department of Chemistry, Center for Research Computing, Center for Drug Discovery, Design, and Delivery (CD4), Southern Methodist University, Dallas, TX 75275, USA; sxiao@smu.edu (S.X.);  
ptao@smu.edu (P.T.)

<sup>3</sup> Department of Biomedical and Pharmaceutical Sciences, Chapman University School of Pharmacy, Irvine, CA 92618, USA

\* Correspondence: verkhivk@chapman.edu; Tel.: +1-714-516-4586

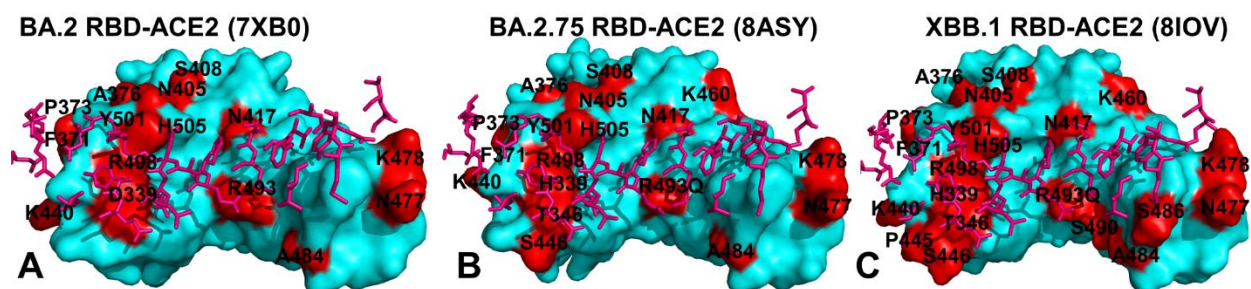

**Figure S1.** Structural organization of the SARS-CoV-2-RBD Omicron BA.2, BA.2.75, and XBB.1. binding interfaces in the complexes with human ACE2 enzyme. (A) The RBD-BA.2 is shown in cyan surface from the top view. The ACE2 binding residues are shown in pink sticks. The Omicron RBD BA.2 sites (G339D, S371F, S373P, S375F, T376A, D405N, R408S, K417N, N440K, S477N, T478K, E484A, Q493R, Q498R, N501Y, Y505H) are shown in red surface and annotated. (B) The RBD-BA.2.75 is shown from the top view. The ACE2 binding residues are shown in pink sticks. The Omicron RBD BA.2.75 sites (G339H, S371F, S373P, S375F, T376A, D405N, R408S, K417N, N440K, G446N, N460K, S477N, T478K, E484A, R493Q, Q498R, N501Y, Y505H) are shown in red surface and annotated. (C) The RBD-XBB.1 is shown from the top view and the ACE2 binding residues are shown in pink-colored sticks. The Omicron RBD XBB.1 sites (G339H, R346T, L368I, S371F, S373P, S375F, T376A, D405N, R408S, K417N, N440K, V445P, G446S, N460K, S477N, T478K, E484A, F486S, F490S, R493Q, Q498R, N501Y, Y505H) are shown in red-colored surface and annotated.

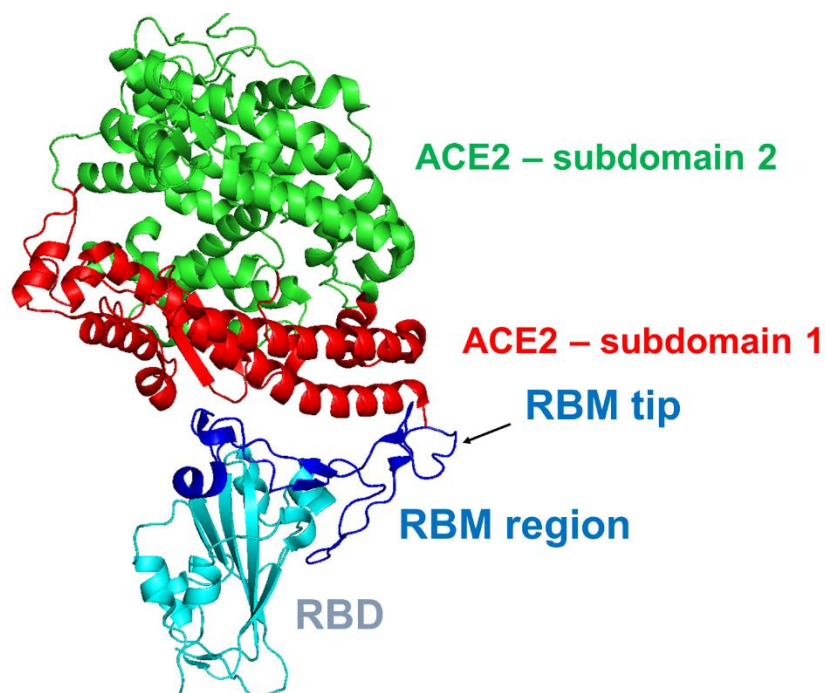

**Figure S2.** A general overview of the secondary structure elements and binding interface in the SARS-CoV-2 RBD complex with human ACE2. The RBD is shown in cyan and secondary structure elements are annotated. The RBM region is in blue ribbons and annotated. The subdomains I and II of human ACE2 are shown in red and green ribbons respectively.

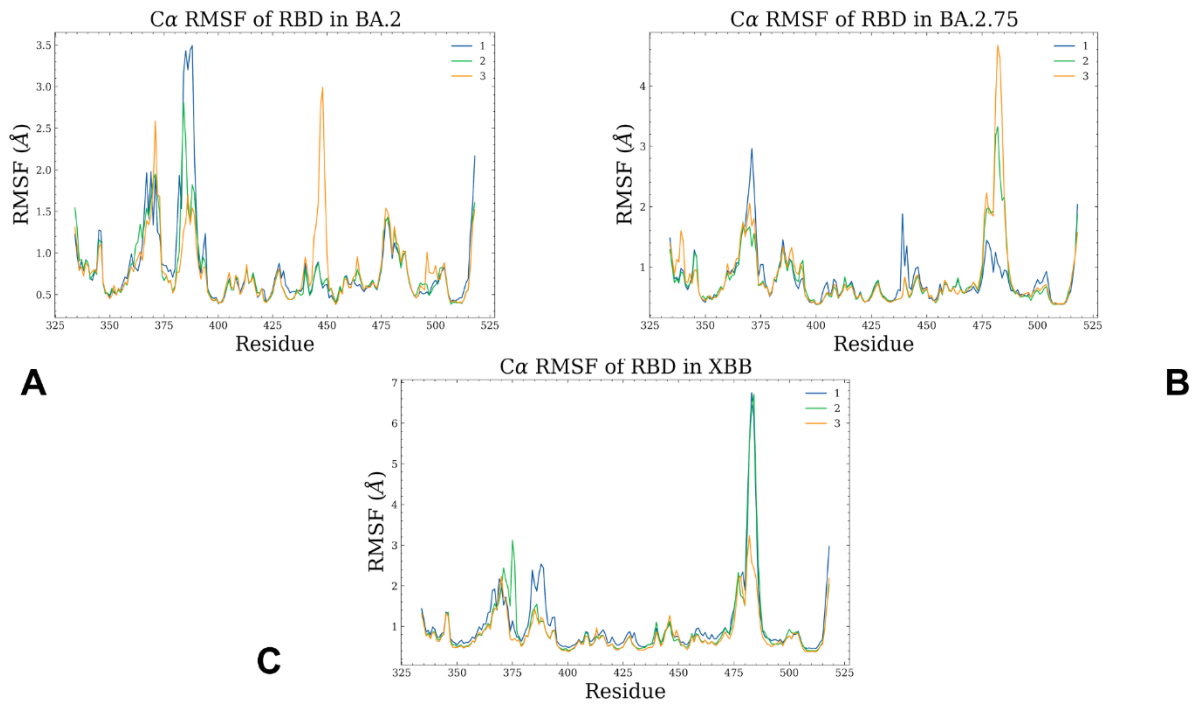

**Figure S3.** Conformational dynamics profiles of the RBD residues obtained from three independent MD simulations of the Omicron RBD BA.2, BA.2.75 and XBB.1 complexes with ACE2. The RMSF profiles for the RBD backbone residues obtained from three independent microsecond MD simulations of the Omicron BA.2 RBD-ACE2 (A), Omicron BA.2.75 RBD-ACE2 (B), Omicron XBB.1 RBD-ACE2 (C).

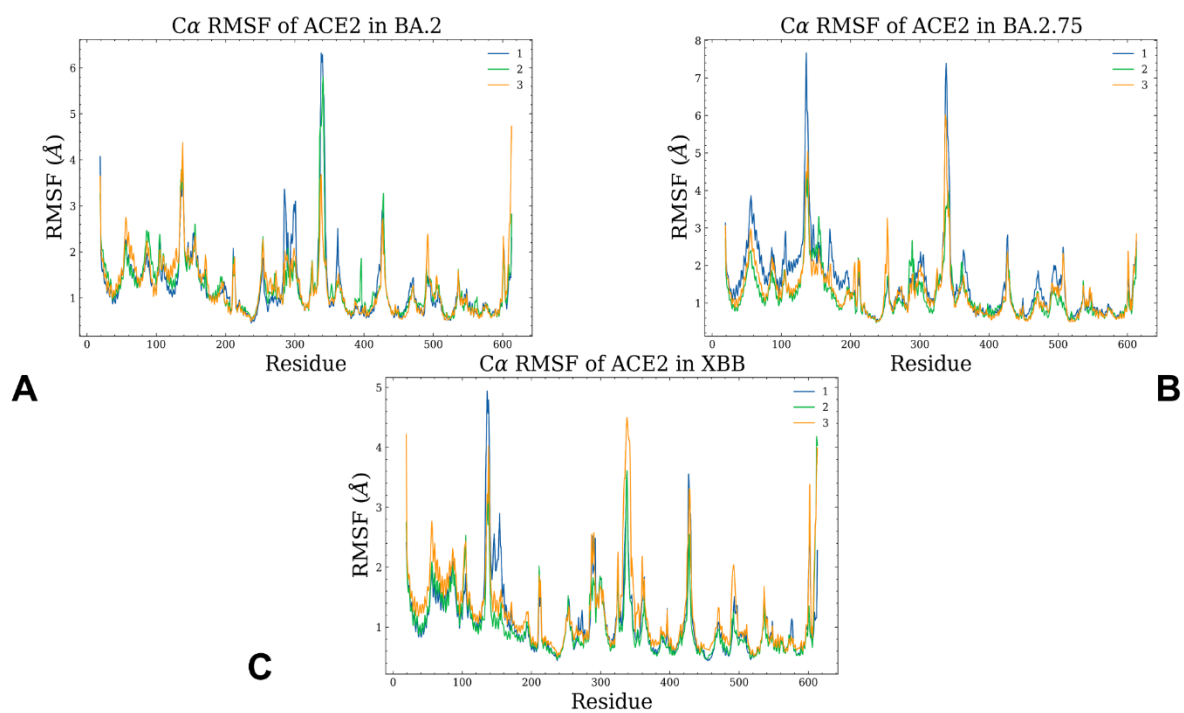

**Figure S4.** Conformational dynamics profiles of the ACE2 residues obtained from three independent MD simulations of the Omicron RBD BA.2, BA.2.75 and XBB.1 complexes with ACE2. The RMSF profiles for the ACE2 backbone residues obtained from three independent microsecond MD simulations of the Omicron BA.2 RBD-ACE2 (A), Omicron BA.2.75 RBD-ACE2 (B), Omicron XBB.1 RBD-ACE2 (C).

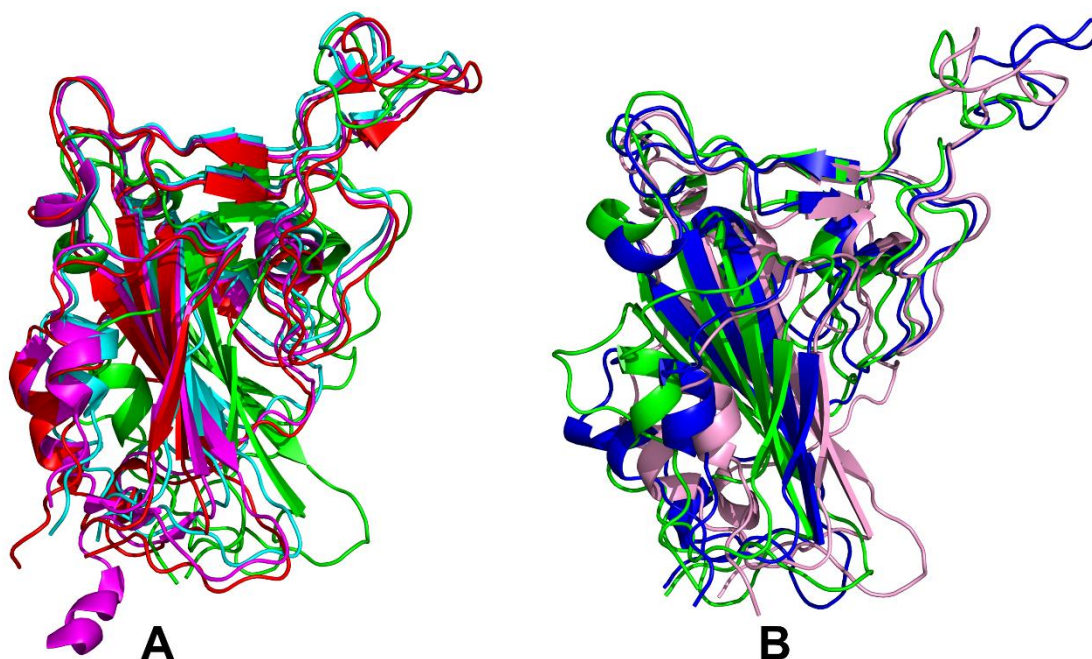

**Figure S5.** Structural analysis of the macrostates obtained from atomistic simulations of Omicron BA.2, BA.2.75 ad XBB.1 complexes with ACE2. (A) Structural alignment of the crystal structures of the Omicron BA.2 RBD (in cyan), BA.2.75 RBD (in magenta), XBB.1 RBD (in red) and RBD conformation of the macrostate 9 (in green). (B) Structural alignment of RBD conformations for macrostate 9 (in green), macrostate 8 (in pink) and macrostate 1 (in blue). The RBD structures are shown in ribbons. For clarity of the presentation the ACE2 molecules that are very similar in all structures and identified macrostates are omitted.

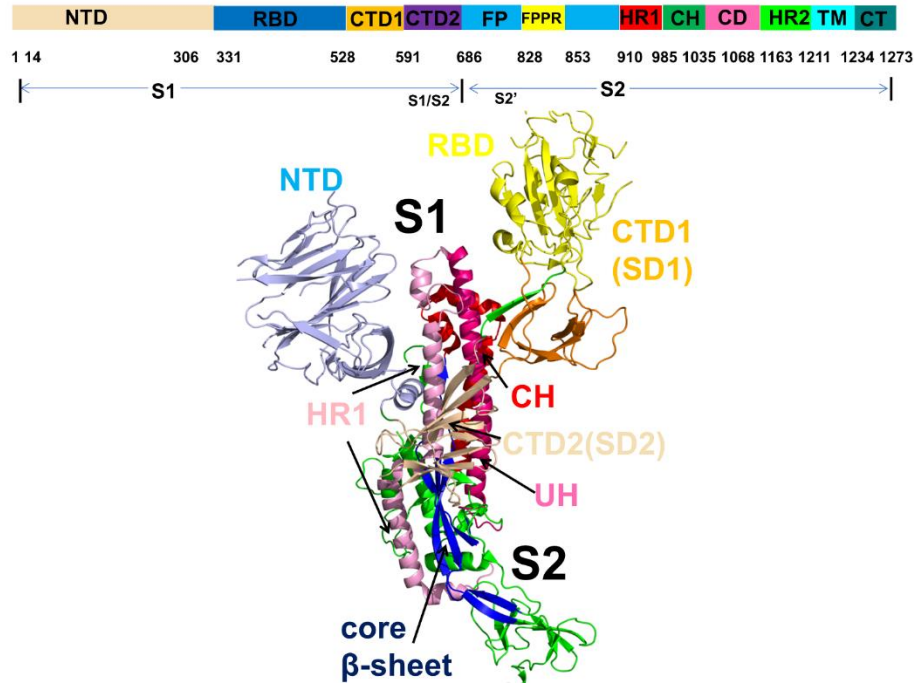

**Figure S6.** A schematic representation of domain organization and residue range for the full-length SARS-CoV-2 S protein. The subunits S1 and S2 include NTD RBD, C-terminal domain 1(CTD1), C-terminal domain 2 (CTD2), S1/S2 cleavage site (S1/S2), S2' cleavage site (S2'), fusion peptide (FP), fusion peptide proximal region (FPPR), heptad repeat 1 (HR1), central helix region (CH), connector domain (CD), heptad repeat 2 (HR2), transmembrane domain (TM), and cytoplasmic tail (CT). The subunits S1 regions are annotated as follows : NTD (residues 14-306) in light blue; RBD (residues 331-528) in yellow; CTD1 (residues 528-591) in orange; CTD2 (residues 592-686) in wheat color ; upstream helix (UH) (residues 736-781) in red; HR1 (residues 910-985) in pink; CH (residues 986-1035) in hot pink; core  $\beta$ -sheet (residues 711-736, 1045-1076) (in blue).



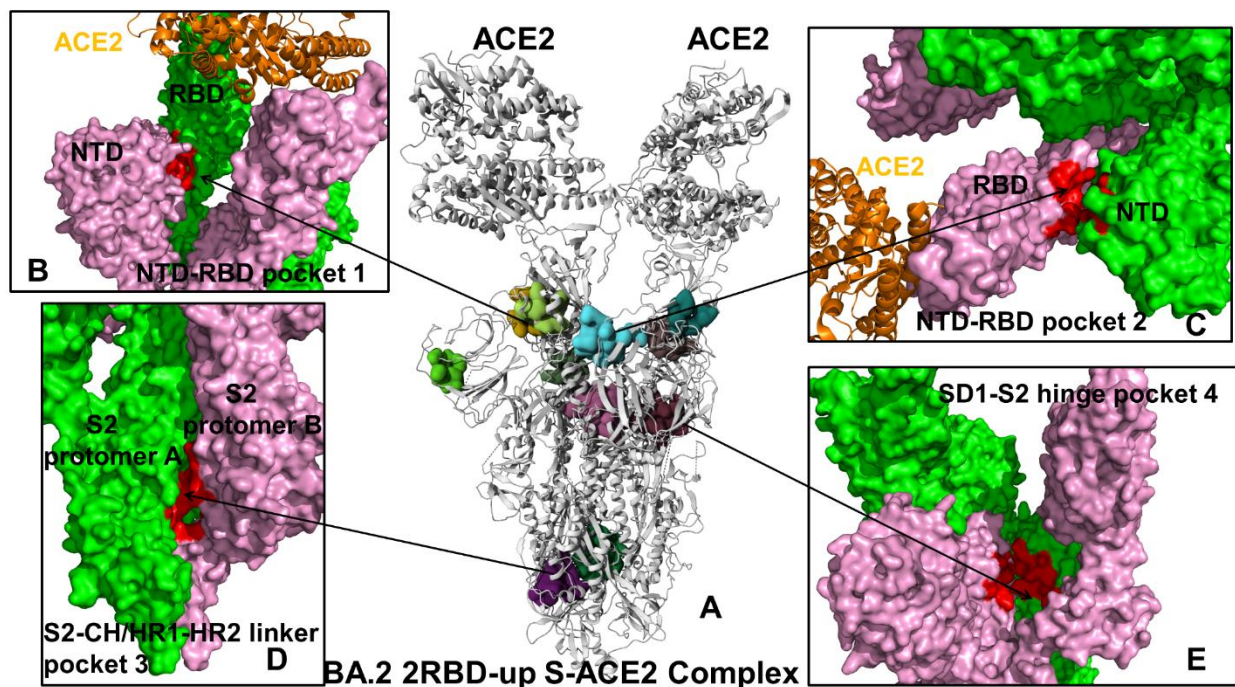

**Figure S7.** Structural map and residue-based close-ups of the top ranked cryptic sites for the ensemble of the S-BA.2 2RBD-up trimer complex with ACE2 . (A) The BA.2 2RBD-up trimer complex (pdb id 7XO7) is shown in ribbons and the top ranked allosteric sites are in surface. (B) Pocket 1 (NTD-RBD inter-protomer pocket, protomer A RBD residues A\_357, A\_359, A\_360, A\_393, A\_394, A\_520, A\_521, A\_523, and protomer C NTD residues C\_115, C\_130, C\_168, C\_230, C\_231). (C) Pocket 2 ( NTD-RBD interprotomer pocket, protomer B NTD residues B\_115, B\_132, B\_167, B\_168, B\_170, B\_230, B\_231, B\_232, and protomer C RBD residues C\_357, C\_393, C\_394, C\_518, C\_520, C\_521, C\_523). (D) Pocket 3 (inter-protomer pocket in S2, protomer A residues A\_1034, A\_1035, A\_1036, A\_886, A\_904, A\_908, and protomer B residues B\_1038, B\_1039, B\_1040, B\_1046, B\_1047, B\_1107, B\_1108, B\_909). (E) Pocket 4 (inter-protomer pocket in S2, protomer A residues A\_1002, A\_970, A\_995, A\_998, A\_999, and protomer B residues B\_1001, B\_1002, B\_756, B\_759, B\_994, B\_995, B\_998, C\_1002, C\_756, C\_970, C\_994, C\_995, C\_998, C\_999). On panels (B-E) the S protein protomers are shown in green and pink surfaces. For clarity only two chains out of three protomers are highlighted. The predicted pockets are shown in red surface.



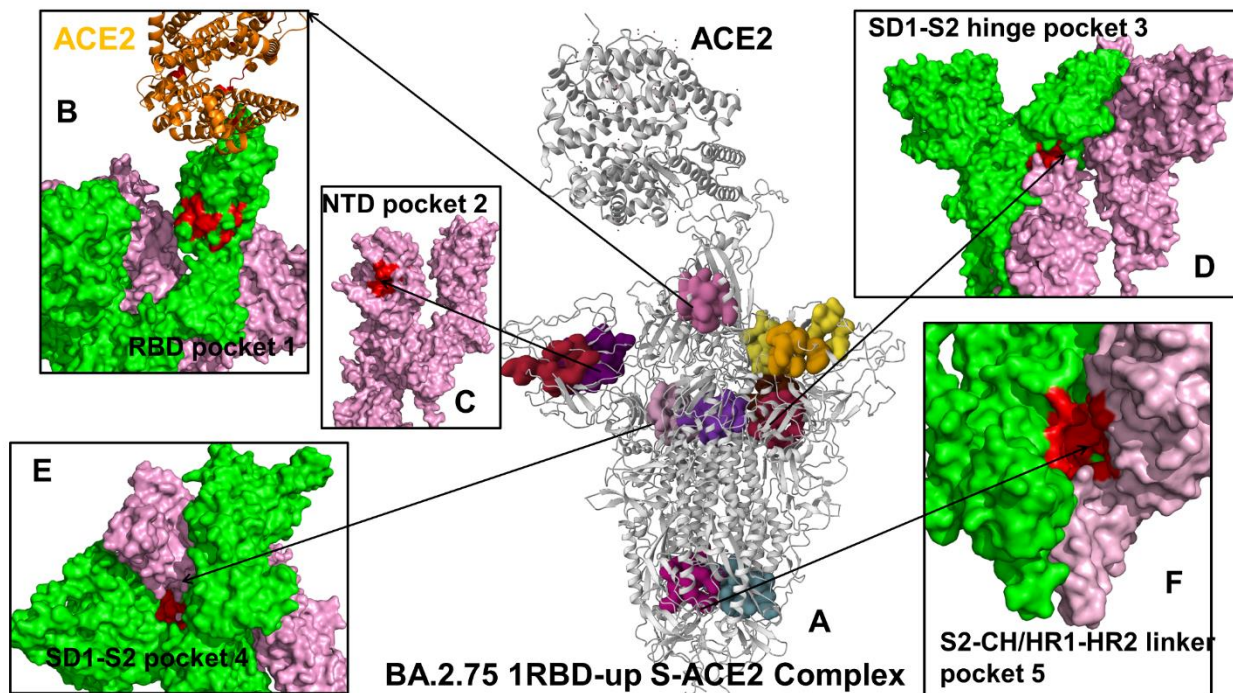

**Figure S8.** Structural map and residue-based close-ups of the top ranked cryptic sites for the ensemble of the S-BA.2.75 1RBD-up trimer complex with ACE2 . (A) The BA.2.75 1RBD-up trimer complex (pdb id 7YR2) is shown in ribbons and the top ranked allosteric sites are in surface. (B) Pocket 1 (RBD pocket residues on RBD-up protomer D: D\_336, D\_338, D\_342, D\_364, D\_365, D\_367, D\_368, D\_369, D\_371, D\_377, D\_379, D\_382, D\_383, D\_384, D\_387, D\_432, D\_434, D\_513, D\_515). (C) Pocket 2 (NTD pocket residues on RBD-up protomer D: D\_100, D\_101, D\_239, D\_240, D\_242, D\_248, D\_249, D\_250, D\_263, D\_264, D\_265, D\_65, D\_66, D\_81, D\_84, D\_94, D\_95, D\_96). (D) Pocket 3 (inter-protomer SD1-S2 hinge pocket. Protomer C residues C\_541, C\_546, C\_547, C\_548, C\_549, C\_570, C\_572, C\_573, C\_587, C\_589, C\_592, and protomer D residues D\_1000, D\_740, D\_741, D\_744, D\_745, D\_855, D\_856, D\_966, D\_976, D\_977, D\_978). (E) Pocket 4 (inter-protomer SD1-S2 pocket. Protomer C residues C\_974, C\_976, C\_979 and protomer E residues E\_391, E\_517, E\_518, E\_519, E\_520, E\_522, E\_544, E\_545, E\_546, E\_565, E\_567, E\_571, E\_573). (F) Pocket 5 (inter-protomer pocket in S2 CH/HR1-HR2. Protomer C residues C\_1035, C\_1036, C\_1038, C\_884, C\_885, C\_886, C\_887, C\_896, C\_904, C\_907, C\_908, and protomer E residues E\_1038, E\_1040, E\_1047, E\_1107, E\_1108, E\_712, E\_909, E\_910). On panels (B-F) the S protein protomers are shown in green and pink surfaces. For clarity only two chains out of three protomers are highlighted. The predicted pockets are shown in red surface.

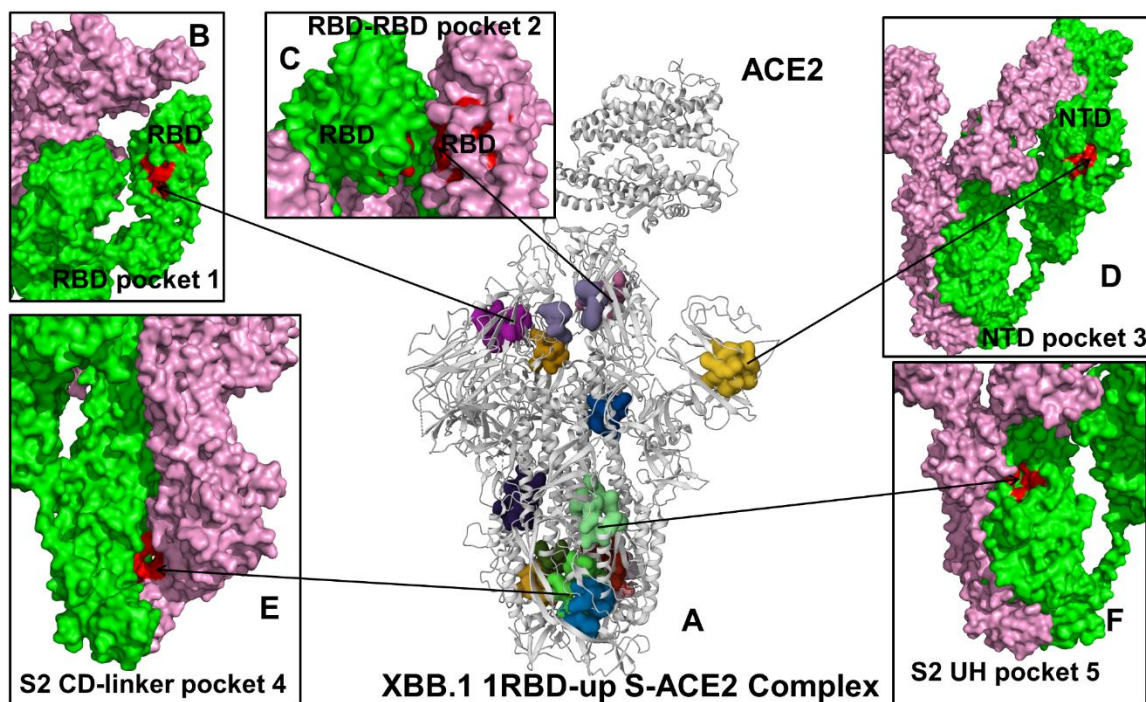

**Table S1.** The list of the intermolecular contacts in the structure of SARS-CoV-2 BA.2 RBD-ACE2 complex (pdb id 7XB0).

| ACE2 Residue | ACE2 Residue Number | ACE2 Chain ID | RBD Residue | RBD Residue Number | RBD Chain ID |
|--------------|---------------------|---------------|-------------|--------------------|--------------|
| ASP          | 355                 | A             | GLY         | 502                | B            |
| TYR          | 83                  | A             | ASN         | 487                | B            |
| GLN          | 24                  | A             | ASN         | 477                | B            |
| ASP          | 355                 | A             | THR         | 500                | B            |
| ASP          | 30                  | A             | PHE         | 456                | B            |
| GLN          | 42                  | A             | TYR         | 449                | B            |
| ASP          | 38                  | A             | TYR         | 501                | B            |
| GLY          | 354                 | A             | TYR         | 501                | B            |
| TYR          | 83                  | A             | TYR         | 489                | B            |
| LEU          | 45                  | A             | VAL         | 445                | B            |
| LEU          | 45                  | A             | THR         | 500                | B            |
| LYS          | 353                 | A             | TYR         | 495                | B            |
| GLN          | 24                  | A             | PHE         | 486                | B            |
| HIS          | 34                  | A             | LEU         | 455                | B            |
| LYS          | 353                 | A             | GLY         | 502                | B            |
| LYS          | 353                 | A             | THR         | 500                | B            |
| SER          | 19                  | A             | ALA         | 475                | B            |
| LYS          | 31                  | A             | LEU         | 455                | B            |
| LEU          | 79                  | A             | PHE         | 486                | B            |
| GLN          | 24                  | A             | TYR         | 489                | B            |
| TYR          | 41                  | A             | ARG         | 498                | B            |
| ASN          | 330                 | A             | THR         | 500                | B            |
| THR          | 20                  | A             | ALA         | 475                | B            |

|     |     |   |     |     |   |
|-----|-----|---|-----|-----|---|
| LYS | 353 | A | VAL | 503 | B |
| ARG | 357 | A | THR | 500 | B |
| LYS | 353 | A | HIS | 505 | B |
| TYR | 41  | A | TYR | 501 | B |
| TYR | 83  | A | PHE | 486 | B |
| GLU | 35  | A | ARG | 493 | B |
| ASP | 38  | A | ARG | 498 | B |
| LEU | 79  | A | GLY | 485 | B |
| GLY | 354 | A | GLY | 502 | B |
| GLN | 24  | A | ALA | 475 | B |
| GLY | 354 | A | THR | 500 | B |
| ASP | 38  | A | GLY | 496 | B |
| PHE | 28  | A | TYR | 489 | B |
| ALA | 25  | A | ASN | 487 | B |
| THR | 27  | A | TYR | 489 | B |
| THR | 27  | A | PHE | 456 | B |
| SER | 19  | A | GLY | 476 | B |
| HIS | 34  | A | TYR | 453 | B |
| GLY | 354 | A | VAL | 503 | B |
| ASP | 30  | A | ASN | 417 | B |
| MET | 82  | A | PHE | 486 | B |
| GLU | 37  | A | HIS | 505 | B |
| GLY | 354 | A | HIS | 505 | B |
| LEU | 45  | A | ARG | 498 | B |
| ASP | 38  | A | TYR | 449 | B |
| THR | 27  | A | ALA | 475 | B |

|     |     |   |     |     |   |
|-----|-----|---|-----|-----|---|
| ASP | 355 | A | TYR | 501 | B |
| LYS | 353 | A | ARG | 403 | B |
| HIS | 34  | A | ARG | 493 | B |
| GLN | 325 | A | GLN | 506 | B |
| TYR | 41  | A | THR | 500 | B |
| HIS | 34  | A | ARG | 403 | B |
| GLN | 24  | A | GLY | 476 | B |
| GLY | 352 | A | GLY | 502 | B |
| GLN | 24  | A | ASN | 487 | B |
| GLN | 42  | A | ARG | 498 | B |
| LYS | 31  | A | ARG | 493 | B |
| ASP | 38  | A | TYR | 495 | B |
| SER | 19  | A | ASN | 477 | B |
| LYS | 353 | A | TYR | 501 | B |
| ASP | 30  | A | LEU | 455 | B |
| LYS | 31  | A | TYR | 489 | B |
| LYS | 31  | A | PHE | 456 | B |
| LYS | 31  | A | GLY | 485 | B |
| HIS | 34  | A | ASN | 417 | B |
| THR | 27  | A | TYR | 473 | B |
| THR | 20  | A | ASN | 477 | B |
| GLY | 326 | A | THR | 500 | B |
| GLN | 42  | A | GLY | 446 | B |
| GLY | 352 | A | TYR | 501 | B |
| ASN | 330 | A | PRO | 499 | B |

**Table S2.** The list of the intermolecular contacts in the structure of SARS-CoV-2 BA.2.75 RBD-ACE2 complex (pdb id 8ASY).

| ACE2<br>Residue | ACE2<br>Residue<br>Number | ACE2<br>Chain ID | RBD<br>Residue | RBD<br>Residue<br>Number | RBD<br>Chain ID |
|-----------------|---------------------------|------------------|----------------|--------------------------|-----------------|
| ARG             | 357                       | A                | THR            | 500                      | B               |
| LYS             | 31                        | A                | PHE            | 456                      | B               |
| GLU             | 35                        | A                | GLN            | 493                      | B               |
| ASP             | 38                        | A                | TYR            | 449                      | B               |
| ASP             | 355                       | A                | GLY            | 502                      | B               |
| LYS             | 353                       | A                | GLY            | 496                      | B               |
| GLU             | 37                        | A                | HIS            | 505                      | B               |
| LEU             | 45                        | A                | THR            | 500                      | B               |
| THR             | 27                        | A                | ALA            | 475                      | B               |
| ASN             | 330                       | A                | THR            | 500                      | B               |
| TYR             | 83                        | A                | TYR            | 489                      | B               |
| ASP             | 30                        | A                | PHE            | 456                      | B               |
| THR             | 27                        | A                | TYR            | 489                      | B               |
| ASP             | 355                       | A                | THR            | 500                      | B               |
| LYS             | 353                       | A                | TYR            | 495                      | B               |
| HIS             | 34                        | A                | GLN            | 493                      | B               |
| PHE             | 28                        | A                | TYR            | 489                      | B               |
| PHE             | 28                        | A                | ASN            | 487                      | B               |
| ASP             | 38                        | A                | GLY            | 496                      | B               |
| SER             | 19                        | A                | ASN            | 477                      | B               |
| LYS             | 353                       | A                | HIS            | 505                      | B               |
| ASP             | 38                        | A                | TYR            | 495                      | B               |



|     |     |   |     |     |   |
|-----|-----|---|-----|-----|---|
| LYS | 353 | A | GLY | 502 | B |
| SER | 19  | A | ALA | 475 | B |
| THR | 27  | A | PHE | 456 | B |
| GLY | 354 | A | TYR | 501 | B |
| GLN | 24  | A | ASN | 477 | B |
| LEU | 79  | A | PHE | 486 | B |
| GLN | 42  | A | ARG | 498 | B |
| TYR | 83  | A | ASN | 487 | B |
| LYS | 353 | A | TYR | 501 | B |
| LYS | 31  | A | LEU | 455 | B |
| GLY | 354 | A | THR | 500 | B |
| LYS | 353 | A | THR | 500 | B |
| TYR | 83  | A | PHE | 486 | B |
| GLN | 24  | A | TYR | 489 | B |
| LEU | 45  | A | VAL | 445 | B |
| ASP | 30  | A | LEU | 455 | B |
| LYS | 353 | A | ARG | 498 | B |
| HIS | 34  | A | ASN | 417 | B |
| ASP | 38  | A | TYR | 501 | B |
| GLY | 354 | A | HIS | 505 | B |
| GLY | 354 | A | GLY | 502 | B |
| GLN | 42  | A | TYR | 449 | B |
| TYR | 41  | A | TYR | 501 | B |
| MET | 82  | A | PHE | 486 | B |
| HIS | 34  | A | TYR | 453 | B |
| GLY | 352 | A | TYR | 501 | B |

|     |     |   |     |     |   |
|-----|-----|---|-----|-----|---|
| ALA | 25  | A | ASN | 487 | B |
| TYR | 41  | A | THR | 500 | B |
| SER | 19  | A | GLY | 476 | B |
| LYS | 31  | A | TYR | 489 | B |
| LYS | 31  | A | GLN | 493 | B |
| GLY | 354 | A | VAL | 503 | B |
| ASP | 355 | A | TYR | 501 | B |
| ASP | 38  | A | ARG | 498 | B |
| TYR | 41  | A | ARG | 498 | B |
| LEU | 45  | A | ARG | 498 | B |
| GLN | 24  | A | ALA | 475 | B |
| GLN | 24  | A | GLY | 476 | B |
| GLN | 42  | A | SER | 446 | B |
| HIS | 34  | A | LEU | 455 | B |
| THR | 27  | A | TYR | 473 | B |
| GLN | 24  | A | ASN | 487 | B |
| LYS | 31  | A | PHE | 490 | B |
| GLN | 325 | A | VAL | 503 | B |
| GLN | 24  | A | PHE | 486 | B |

**Table S3.** The list of the intermolecular contacts in the structure of SARS-CoV-2 XBB.1 RBD-ACE2 complex (pdb id 8IOV).

| ACE2 Residue | ACE2 Residue Number | ACE2 Chain ID | RBD Residue | RBD Residue Number | RBD Chain ID |
|--------------|---------------------|---------------|-------------|--------------------|--------------|
| LEU          | 79                  | A             | GLY         | 485                | B            |
| ALA          | 25                  | A             | ASN         | 487                | B            |
| HIS          | 34                  | A             | ARG         | 403                | B            |
| LEU          | 45                  | A             | THR         | 500                | B            |
| GLN          | 24                  | A             | ALA         | 475                | B            |
| TYR          | 83                  | A             | ASN         | 487                | B            |
| ASN          | 330                 | A             | THR         | 500                | B            |
| ASP          | 30                  | A             | ASN         | 417                | B            |
| ASP          | 38                  | A             | SER         | 494                | B            |
| TYR          | 41                  | A             | ARG         | 498                | B            |
| GLN          | 42                  | A             | ARG         | 498                | B            |
| TYR          | 83                  | A             | TYR         | 489                | B            |
| GLY          | 354                 | A             | GLY         | 502                | B            |
| LYS          | 31                  | A             | SER         | 490                | B            |
| HIS          | 34                  | A             | TYR         | 453                | B            |
| LYS          | 353                 | A             | GLY         | 504                | B            |
| TYR          | 41                  | A             | THR         | 500                | B            |
| THR          | 20                  | A             | ASN         | 477                | B            |
| LEU          | 79                  | A             | SER         | 486                | B            |
| THR          | 27                  | A             | ALA         | 475                | B            |
| LYS          | 353                 | A             | GLY         | 502                | B            |
| ALA          | 36                  | A             | ARG         | 493                | B            |
| MET          | 82                  | A             | ASN         | 487                | B            |

|     |     |   |     |     |   |
|-----|-----|---|-----|-----|---|
| HIS | 34  | A | ASN | 417 | B |
| GLY | 326 | A | THR | 500 | B |
| GLN | 24  | A | TYR | 489 | B |
| ASP | 38  | A | TYR | 495 | B |
| GLY | 354 | A | TYR | 501 | B |
| LYS | 31  | A | TYR | 489 | B |
| GLY | 354 | A | HIS | 505 | B |
| GLN | 24  | A | GLY | 476 | B |
| PHE | 28  | A | TYR | 489 | B |
| ASP | 355 | A | GLY | 502 | B |
| TYR | 83  | A | SER | 486 | B |
| ASP | 38  | A | ARG | 498 | B |
| ASN | 330 | A | PRO | 499 | B |
| GLN | 42  | A | TYR | 449 | B |
| LYS | 353 | A | TYR | 501 | B |
| HIS | 34  | A | SER | 494 | B |
| LEU | 45  | A | PRO | 445 | B |
| LYS | 353 | A | HIS | 505 | B |
| LYS | 31  | A | LEU | 455 | B |
| LYS | 353 | A | VAL | 503 | B |
| GLN | 24  | A | ASN | 477 | B |
| ASP | 38  | A | TYR | 501 | B |
| LEU | 45  | A | ARG | 498 | B |
| ASP | 355 | A | TYR | 501 | B |
| LYS | 31  | A | ALA | 484 | B |
| LEU | 39  | A | ARG | 493 | B |

|     |     |   |     |     |   |
|-----|-----|---|-----|-----|---|
| LYS | 353 | A | TYR | 495 | B |
| HIS | 34  | A | ARG | 493 | B |
| MET | 82  | A | SER | 486 | B |
| LYS | 353 | A | GLN | 506 | B |
| LYS | 31  | A | PHE | 456 | B |
| GLY | 352 | A | TYR | 501 | B |
| ASP | 30  | A | LEU | 455 | B |
| LYS | 31  | A | CYS | 488 | B |
| GLY | 354 | A | THR | 500 | B |
| SER | 19  | A | GLY | 476 | B |
| GLN | 325 | A | GLN | 506 | B |
| PHE | 28  | A | PHE | 456 | B |
| ASP | 38  | A | TYR | 449 | B |
| HIS | 34  | A | GLU | 406 | B |
| ASP | 30  | A | PHE | 456 | B |
| THR | 27  | A | TYR | 473 | B |
| TYR | 41  | A | TYR | 501 | B |
| GLN | 42  | A | SER | 446 | B |
| THR | 27  | A | PHE | 456 | B |
| SER | 19  | A | ASN | 477 | B |
| GLN | 24  | A | ASN | 487 | B |
| ASP | 38  | A | ARG | 493 | B |
| ARG | 357 | A | THR | 500 | B |
| HIS | 34  | A | LEU | 455 | B |
| GLU | 35  | A | ARG | 493 | B |
| GLU | 37  | A | HIS | 505 | B |

|     |     |   |     |     |   |
|-----|-----|---|-----|-----|---|
| THR | 27  | A | TYR | 489 | B |
| ASP | 355 | A | THR | 500 | B |
| SER | 19  | A | ALA | 475 | B |
| ASP | 38  | A | GLY | 496 | B |
| GLY | 354 | A | VAL | 503 | B |
